# Supplementary material
Source: PubMed Central journal article supplement (PMC3887463)
Supplement: Supp_Fig1.pdf [file Supp_Fig1.pdf]

## Supplementary Data

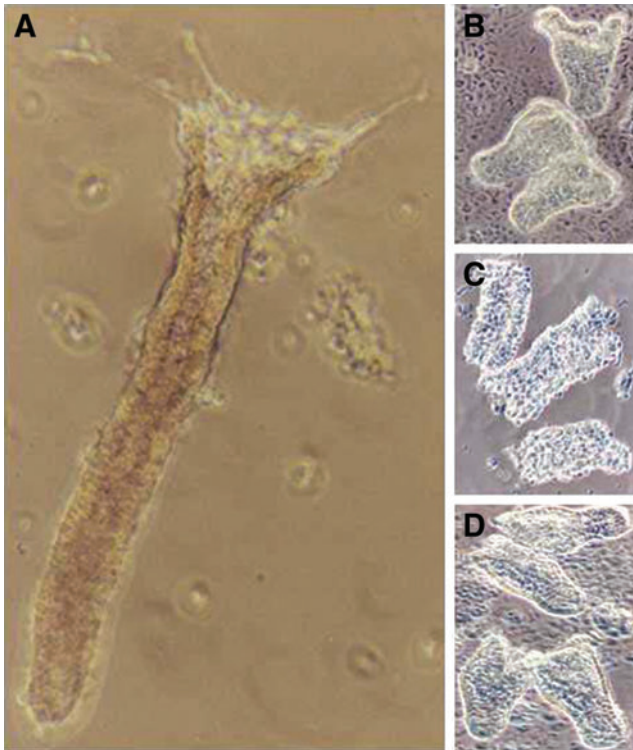

**SUPPLEMENTARY FIG. S1.** Purified colonic crypts and extracted crypt subsections in suspension. Isolated crypts contain only live epithelial cells and are free from other contaminating cell types. Images were taken at 10 $\times$  magnification. **(A)** Whole crypts were isolated from normal colonic mucosa in 3 mM EDTA, pH 8 in 1 $\times$  DPBS. **(B)** Crypt top subsections extracted from normal colonic mucosa in 0.1 mM EDTA, pH 8 in 1 $\times$  DPBS. **(C)** Middle crypt subsections extracted from normal colonic mucosa in 0.5 mM EDTA, pH 8 in 1 $\times$  DPBS. **(D)** Bottom crypt subsections extracted from normal colonic mucosa in 3 mM EDTA, pH 8 in 1 $\times$  DPBS. DPBS, Dulbecco's phosphate buffered saline.
