# Supplementary material
Source: PubMed Central journal article supplement (PMC3887463)
Supplement: Supp_Fig2.pdf [file Supp_Fig2.pdf]

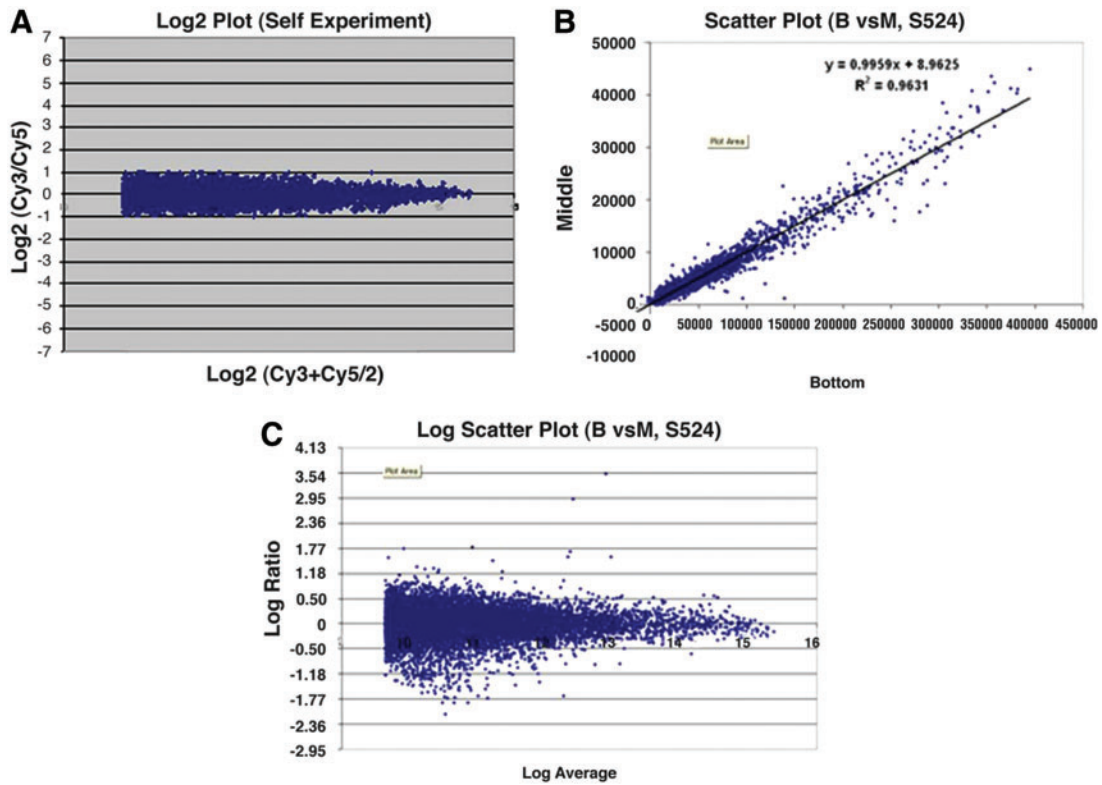

**SUPPLEMENTARY FIG. S2.** Scatter plots of a representative array. Samples hybridized are bottom versus top. Data were generated and analyzed using GeneSpring 5.0. **(A)** Log scatter plot showing the distribution of data for self-hybridization after normalization using a lower value cutoff. **(B)** Linear scatter plot showing slope and correlation values of data comparing both samples. This was used as a control for experimental bias. **(C)** Log scatter plot showing the distribution of data points after normalization with a lower cutoff value.
