# Supplementary material
Source: PubMed Central journal article supplement (PMC3887463)
Supplement: Supp_Fig4.pdf [file Supp_Fig4.pdf]

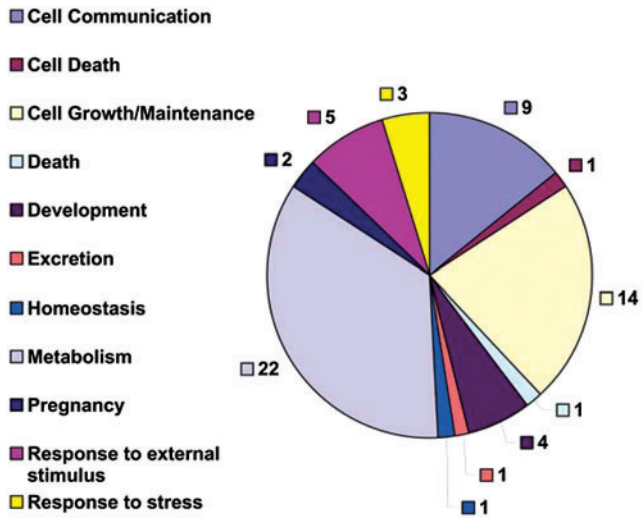

**SUPPLEMENTARY FIG. S4.** Ontology of genes upregulated in the crypt bottom versus middle and top. Of the 63 genes with known identity, 18 (28.6%) were classified as being involved in growth and/or development.
