# Supplementary material
Source: PubMed Central journal article supplement (PMC3887463)
Supplement: Supp_Fig5.pdf [file Supp_Fig5.pdf]

Phosphatidylinositol signaling system

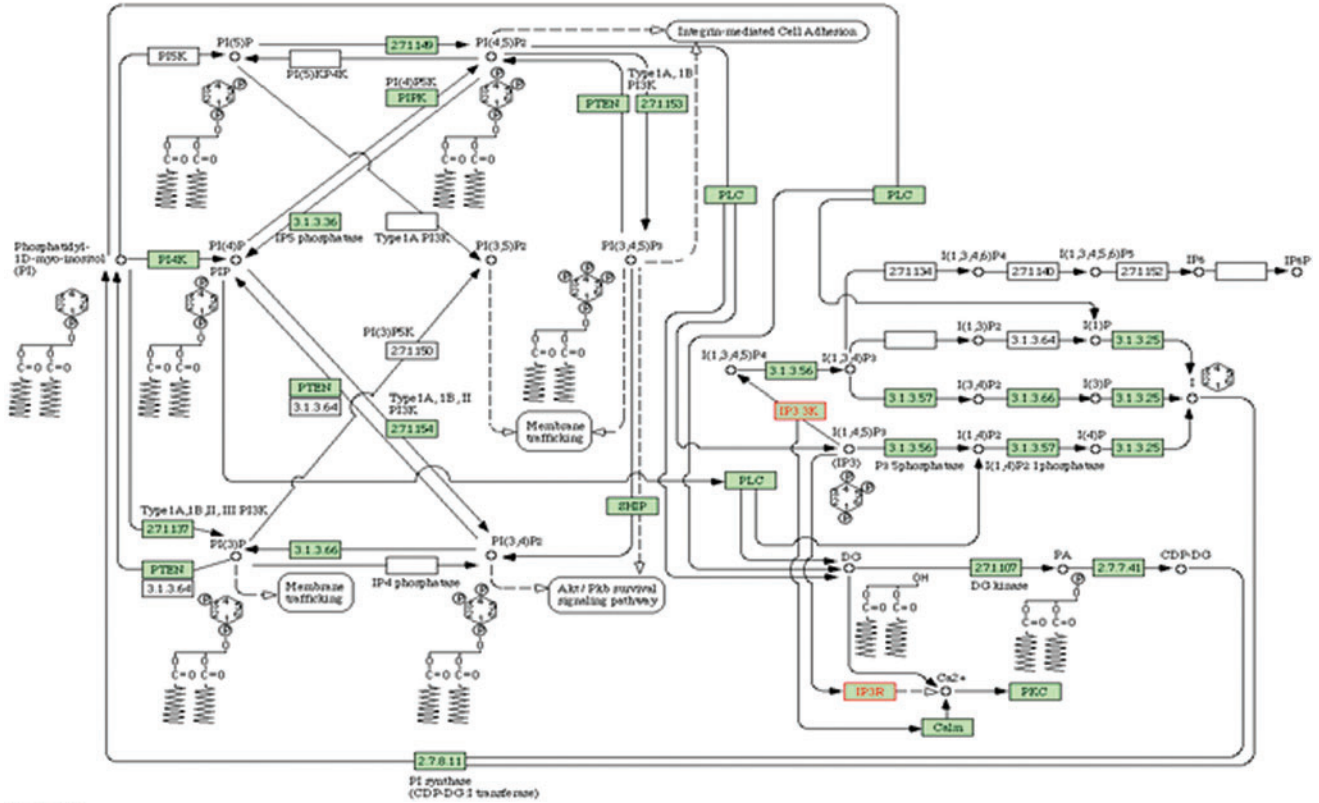

**SUPPLEMENTARY FIG. S5.** Pathway analysis using DAVID software. Results showed that the PI3 kinase pathway, a key pathway in cell choice between proliferation and survival, is upregulated in the base of the crypt. At least 6 genes in our gene list of 60 map to this pathway.
