# Supplementary material
Source: PubMed Central journal article supplement (PMC3887463)
Supplement: Supp_Fig6.pdf [file Supp_Fig6.pdf]

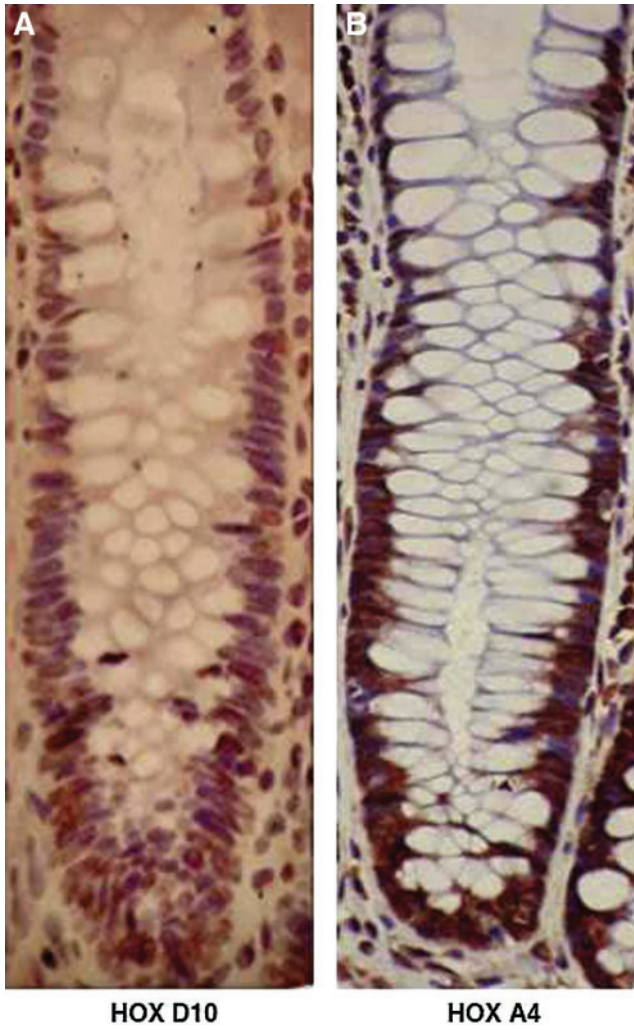

**SUPPLEMENTARY FIG. S6.** Immunohistochemical staining of paraffin-embedded tissue sections of normal colonic mucosa. HOXD10 and HOXA4 are preferentially expressed in the SC-enriched population of cells at the crypt bottom. **(A)** HOXD10 expression at the bottom of the normal colonic crypt. **(B)** Prominent HOXA4 expression at the bottom of the colonic crypt. HOX, homeobox.
