# Supplementary material
Source: PubMed Central journal article supplement (PMC3887463)
Supplement: Supp_Fig7.pdf [file Supp_Fig7.pdf]

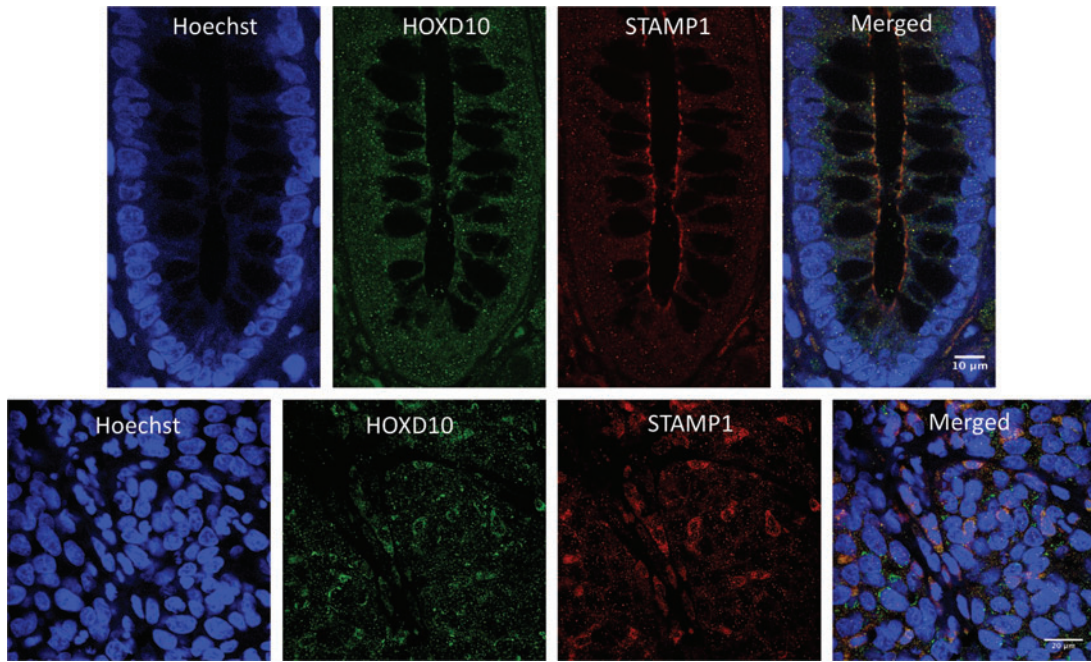

**SUPPLEMENTARY FIG. S7.** Co-staining for HOXD10 and STAMP1 in normal colon and carcinomas. *Blue* indicates nuclear staining with Hoechst dye; *green* indicates HOXD10 expression; *red* indicates STAMP1 expression. *Upper panels:* normal colon. STAMP1-positive cells co-stained with HOXD10 at the bottom of the normal colonic crypt. Scale bar=10 μm. *Lower panels:* malignant colon. Increased co-staining is seen for HOXD10 and STAMP1 in tumor tissues. Scale bar=20 μm.
