# Supplementary material
Source: PubMed Central journal article supplement (PMC3887463)
Supplement: Supp_Fig8.pdf [file Supp_Fig8.pdf]

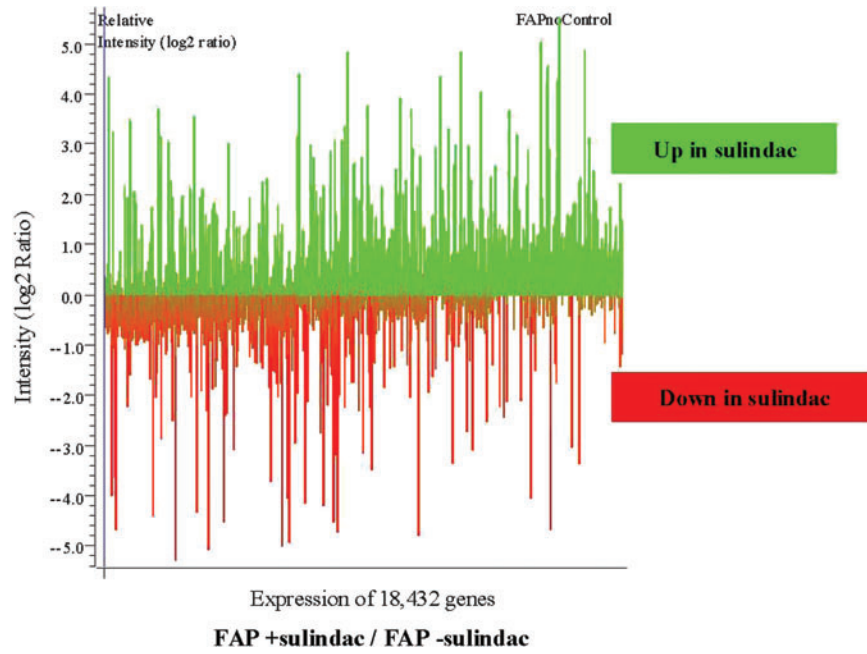

**SUPPLEMENTARY FIG. S8.** Analysis of gene expression in FAP crypts isolated from patients treated or not treated with Sulindac. Of the 18,474 genes, 271 were upregulated more than twofold compared with untreated FAP crypts; 421 were downregulated more than twofold compared with untreated FAP crypts. FAP, familial adenomatous polyposis.
