# Supplementary material
Source: PubMed Central journal article supplement (PMC3887463)
Supplement: Supp_Table1.pdf [file Supp_Table1.pdf]

**Table 1.**

**Upregulated Genes in Crypt Bottom**

| <b>Gene Symbol</b> | <b>Gene Name</b>                                                                                          | <b>Function</b>                                                                                                             | <b>Cellular Component</b>             | <b>Accession ID</b> | <b>Fold Increase</b> |
|--------------------|-----------------------------------------------------------------------------------------------------------|-----------------------------------------------------------------------------------------------------------------------------|---------------------------------------|---------------------|----------------------|
| <b>PCANAP1</b>     | prostate cancer associated protein 1                                                                      | undefined                                                                                                                   | undefined                             | W31561              | 5.6                  |
| <b>SLC14A1</b>     | transporter), member 1 (Kidd blood group)                                                                 | protein binding, urea transporter                                                                                           | plasma membrane                       | N47509              | 2.9                  |
| <b>SERPINA8</b>    | serine (or cysteine) proteinase inhibitor, clade A (alpha-1 antiproteinase, antitrypsin), member 8        | protein binding, hormone activity, serine proteinase inhibitor, cell-cell signaling                                         | soluble fraction                      | H22747              | 2.8                  |
|                    | ESTs                                                                                                      | undefined                                                                                                                   | undefined                             | R67379              | 2.3                  |
| <b>SLC1A2</b>      | solute carrier family 1 (glial high affinity glutamate transporter), member 2                             | undefined                                                                                                                   | undefined                             | H18570              | 2.3                  |
| <b>PCDHAC1</b>     | protocadherin alpha subfamily C, 1                                                                        | calcium ion binding, cell adhesion molecule activity, neurogenesis                                                          | integral to plasma membrane           | W32160              | 2.0                  |
|                    | ESTs                                                                                                      | undefined                                                                                                                   | undefined                             | R63876              | 2.0                  |
|                    | ESTs                                                                                                      | undefined                                                                                                                   | undefined                             | H43974              | 2.0                  |
| <b>CYB5-M</b>      | cytochrome B5 outer mitochondrial precursor                                                               | undefined                                                                                                                   | undefined                             | T95206              | 2.0                  |
|                    | ESTs                                                                                                      | undefined                                                                                                                   | undefined                             | T98389              | 1.9                  |
| <b>DF</b>          | D component of complement (adipsin)                                                                       | hydrolase activity, complement factor D activity, peptidase activity                                                        | undefined                             | AA056541            | 1.9                  |
|                    | EST                                                                                                       | undefined                                                                                                                   | undefined                             | AA127845            | 1.9                  |
| <b>HOX10D</b>      | homeobox 10D                                                                                              | nucleic acid binding, DNA-dependent regulator of transcription, RNA polII transcription factor activity, development        | nucleus                               | AA043380            | 1.9                  |
|                    | ESTs                                                                                                      | undefined                                                                                                                   | undefined                             | AA045634            | 1.9                  |
| <b>FLJ31751</b>    | hypothetical protein FLJ31751, Moderately similar to B43284 zinc finger protein ZNF48 - human [H.sapiens] | undefined                                                                                                                   | undefined                             | T75281              | 1.8                  |
| <b>FLJ20493</b>    | hypothetical protein                                                                                      | calcium ion binding, classic complement activation, hydrolase activity (trypsin/chymotrypsin), proteolysis and peptidolysis | undefined                             | W93580              | 1.8                  |
| <b>COPB</b>        | coatamer protein complex, subunit beta                                                                    | intracellular non-selective protein transporter, pathogenesis                                                               | Golgi vesicle/cytosol/ Golgi membrane | N75060              | 1.8                  |
| <b>C21orf70</b>    | chromosome 21 open reading frame 70                                                                       | undefined                                                                                                                   | undefined                             | AA037661            | 1.8                  |
| <b>ENPP4</b>       | ectonucleotide pyrophosphatase/phosphodiesterase 4 (putative function)                                    | hydrolase activity, nucleotide metabolism                                                                                   | undefined                             | W32652              | 1.8                  |
| <b>JIK</b>         | STE20-like kinase                                                                                         | protein kinase inhibitor, protein serine/threonine kinase activity, JNK cascade, protein amino acid phosphorylation         | undefined                             | AA053510            | 1.8                  |
| <b>RBMX</b>        | RNA binding motif protein, X chromosome                                                                   | undefined                                                                                                                   | undefined                             | N92899              | 1.8                  |
| <b>GEF</b>         | GLUT4 enhancer factor                                                                                     | DNA binding, DNA-dependent regulator of transcription                                                                       | nucleus                               | AA028142            | 1.8                  |

|                 |                                                                                         |                                                                                                      |                             |          |     |
|-----------------|-----------------------------------------------------------------------------------------|------------------------------------------------------------------------------------------------------|-----------------------------|----------|-----|
| <b>PLGL</b>     | plasminogen-like                                                                        | serine peptidase/plasmin activity                                                                    | undefined                   | N76070   | 1.8 |
| <b>LZTR1</b>    | leucine-zipper-like transcriptional regulator, 1                                        | protein binding                                                                                      | undefined                   | R61014   | 1.8 |
|                 | ESTs                                                                                    | undefined                                                                                            | undefined                   | R17486   | 1.8 |
| <b>KIAA1046</b> | KIAA1046 protein                                                                        | undefined                                                                                            | undefined                   | N72176   | 1.7 |
|                 | ESTs                                                                                    | undefined                                                                                            | undefined                   | H17030   | 1.7 |
|                 | GTPase regulator associated with the focal adhesion kinase pp125(FAK); KIAA0621 protein | electron transporter, oxidoreductase activity, vitamin A metabolism                                  | undefined                   | AA056765 | 1.7 |
| <b>GRAF</b>     | ESTs                                                                                    | undefined                                                                                            | undefined                   | H37799   | 1.7 |
|                 |                                                                                         |                                                                                                      | nucleus,                    |          |     |
| <b>ALTE</b>     | Ac-like transposable element                                                            | DNA binding, transposase activity                                                                    | chromosome                  | N75330   | 1.7 |
|                 | serine hydroxymethyltransferase 2 (mitochondrial)                                       | undefined                                                                                            | undefined                   | H22827   | 1.7 |
| <b>SHMT2</b>    | lymphocyte activation-associated protein                                                | undefined                                                                                            | undefined                   | R78728   | 1.7 |
| <b>LOC51088</b> | ESTs                                                                                    | undefined                                                                                            | undefined                   | AA055329 | 1.7 |
|                 |                                                                                         | RNA binding, structural constituent of ribosome, protein biosynthesis                                | intracellular               | W32999   | 1.7 |
| <b>RPS26</b>    | ribosomal protein S26                                                                   |                                                                                                      |                             |          |     |
|                 | signal transducing adaptor molecule (SH3 and ITAM motif) 2                              | undefined                                                                                            | undefined                   | W42638   | 1.7 |
| <b>STAM2</b>    | glutamate receptor, ionotropic, N-methyl D-aspartate 1                                  | undefined                                                                                            | undefined                   | R88266   | 1.7 |
| <b>GRIN1</b>    | phosphoinositide-specific phospholipase C-beta 1                                        | undefined                                                                                            | undefined                   | W33159   | 1.7 |
| <b>PLCB1</b>    | protein kinase NYD_SP15                                                                 | undefined                                                                                            | undefined                   | N70777   | 1.7 |
| <b>NYD-SP15</b> | fibrinogen, gamma polypeptide                                                           | undefined                                                                                            | undefined                   | N79517   | 1.7 |
| <b>FGG</b>      | ESTs, Weakly similar to AF151818_1 CGI-60 protein [H.sapiens]                           | undefined                                                                                            | undefined                   | R08338   | 1.7 |
|                 | ESTs                                                                                    | undefined                                                                                            | undefined                   | R24750   | 1.7 |
|                 |                                                                                         | magnesium ion/ATP binding, cation transporter, Na/K+ exchange ATPase, hydrolase activity, metabolism | integral to membrane        | H14143   | 1.7 |
| <b>ATP1A3</b>   | ATPase, Na+/K+ transporting, alpha 3 polypeptide                                        |                                                                                                      |                             |          |     |
| <b>FLJ20539</b> | hypothetical protein FLJ20539                                                           | undefined                                                                                            | undefined                   | AA057468 | 1.7 |
| <b>MDS015</b>   | hypothetical protein MDS015                                                             | undefined                                                                                            | undefined                   | N34884   | 1.7 |
|                 | natural killer-tumor recognition sequence                                               | cyclosporin A binding, cis-trans isomerase activity, protein folding                                 | plasma membrane             | AA007368 | 1.7 |
| <b>NKTR</b>     | ESTs                                                                                    | undefined                                                                                            | undefined                   | W33113   | 1.7 |
|                 | spermidine/spermine N1-acetyltransferase                                                | acyl transferase activity                                                                            | undefined                   | N25817   | 1.7 |
| <b>SAT</b>      | KIAA0854 protein                                                                        | DNA-dependent transcription factor                                                                   | nucleus                     | H83341   | 1.7 |
| <b>KIAA0854</b> | KIAA0616 protein                                                                        | undefined                                                                                            | undefined                   | R68034   | 1.7 |
| <b>KIAA0616</b> | ESTs                                                                                    | undefined                                                                                            | undefined                   | R73398   | 1.7 |
|                 | ESTs                                                                                    | undefined                                                                                            | undefined                   | W87279   | 1.7 |
|                 |                                                                                         | magnesium ion binding, phosphoric ester hydrolase activity, serine biosynthesis                      | undefined                   | H38879   | 1.7 |
| <b>PSPH</b>     | phosphoserine phosphatase                                                               |                                                                                                      |                             |          |     |
|                 | Arg/Abl-interacting protein ArgBP2                                                      | cytoskeletal protein binding, constituent of cytoskeleton                                            | nucleus, actin cytoskeleton | AA142922 | 1.7 |
| <b>ARGBP2</b>   | RAP2A, member of RAS oncogene family                                                    | RAS small monomeric GTPase, intracellular signaling cascade                                          | membrane                    | W32474   | 1.7 |
| <b>RAP2A</b>    | ESTs                                                                                    | undefined                                                                                            | undefined                   | R00492   | 1.6 |
|                 | ESTs                                                                                    | undefined                                                                                            | undefined                   | T96973   | 1.6 |

|                 |                                                                                               |           |                                                                                                        |                                           |          |     |
|-----------------|-----------------------------------------------------------------------------------------------|-----------|--------------------------------------------------------------------------------------------------------|-------------------------------------------|----------|-----|
|                 | ESTs, Weakly similar to prolyl 4-hydroxylase beta subunit [H.sapiens]                         |           |                                                                                                        |                                           | W32940   | 1.6 |
| <b>FLJ32115</b> |                                                                                               | undefined |                                                                                                        |                                           |          |     |
| <b>FLJ11220</b> | hypothetical protein FLJ11220                                                                 | undefined |                                                                                                        |                                           | H02808   | 1.6 |
| <b>KIAA1350</b> | KIAA1350 protein                                                                              | undefined |                                                                                                        |                                           | W37627   | 1.6 |
|                 |                                                                                               |           | nucleic acid binding/ATP binding, ATP-dependent/RNA helicase, regulation of cell cycle, mRNA splicing  |                                           |          |     |
| <b>DDX16</b>    | DEAD/H (Asp-Glu-Ala-Asp/His) box polypeptide 16                                               |           |                                                                                                        | nucleus                                   | AA042889 | 1.6 |
|                 | Homo sapiens mRNA; cDNA DKFZp564A2463 (from clone DKFZp564A2463)                              | undefined |                                                                                                        |                                           | N75210   | 1.6 |
| <b>FLJ31842</b> | hypothetical protein FLJ31842                                                                 | undefined |                                                                                                        |                                           | H56035   | 1.6 |
| <b>HHLA3</b>    | HERV-H LTR-associating 3                                                                      | undefined |                                                                                                        |                                           | R50257   | 1.6 |
| <b>ALDH1A2</b>  | retinaldehyde dehydrogenase 2                                                                 | undefined |                                                                                                        |                                           | AA036837 | 1.6 |
|                 |                                                                                               |           | hydrolase activity/serine-type peptidase activity, complement factor D activity, nucleotide metabolism |                                           |          |     |
| <b>TMEPAI</b>   | transmembrane, prostate androgen induced RNA                                                  |           |                                                                                                        |                                           | AA126899 | 1.6 |
|                 | undefined                                                                                     | undefined |                                                                                                        |                                           | AA114965 | 1.6 |
| <b>MGC15429</b> | hypothetical protein MGC15429                                                                 | undefined |                                                                                                        |                                           | R48247   | 1.6 |
| <b>FLJ11155</b> | hypothetical protein FLJ11155                                                                 | undefined |                                                                                                        |                                           | N66082   | 1.6 |
|                 | pyruvate dehydrogenase phosphatase                                                            |           |                                                                                                        |                                           |          |     |
| <b>PDP</b>      |                                                                                               | undefined |                                                                                                        |                                           | H10695   | 1.6 |
|                 | Homo sapiens cDNA FLJ12529 fis, clone NT2RM4000156, weakly similar to H.sapiens HPBR11-7 gene |           |                                                                                                        |                                           |          |     |
| <b>FLJ12529</b> |                                                                                               | undefined |                                                                                                        |                                           | T89571   | 1.6 |
|                 | transmembrane 7 superfamily member 2                                                          |           | oxidoreductase, sterol biosynthesis                                                                    | ER/integral to plasma membrane            | R89566   | 1.6 |
| <b>TM7SF2</b>   |                                                                                               |           |                                                                                                        | nucleus, microtubule cytoskeleton complex |          |     |
|                 | pleckstrin homology, Sec7 and coiled/coil domains 1 (cytohesin 1)                             |           | ARF guanyl-nucleotide exchange factor activity, kinesin complex, vesicle-mediated transport            |                                           | T77415   | 1.6 |
| <b>PSCD1</b>    |                                                                                               | undefined |                                                                                                        |                                           | H17336   | 1.6 |
|                 | ESTs                                                                                          | undefined |                                                                                                        |                                           | R94856   | 1.6 |
|                 | hypothetical protein MGC43399, novel human gene mapping to chromosome 1                       |           |                                                                                                        |                                           |          |     |
| <b>MGC43399</b> |                                                                                               | undefined |                                                                                                        |                                           | T78497   | 1.6 |
|                 | ESTs                                                                                          | undefined |                                                                                                        |                                           | T69735   | 1.6 |
|                 | ESTs                                                                                          | undefined |                                                                                                        |                                           | W84871   | 1.6 |
|                 | solute carrier family 7 (cationic amino acid transporter, y+ system), member 6                |           |                                                                                                        |                                           |          |     |
| <b>SLC7A6</b>   |                                                                                               | undefined |                                                                                                        |                                           | AA134825 | 1.6 |
|                 | Homo sapiens clone 23870 mRNA sequence                                                        |           |                                                                                                        |                                           | H98718   | 1.6 |
|                 | rap guanine nucleotide exchange factor                                                        |           |                                                                                                        |                                           |          |     |
| <b>RA-GEF-2</b> |                                                                                               | undefined |                                                                                                        |                                           | N64002   | 1.6 |
| <b>MDS009</b>   | x 009 protein                                                                                 | undefined |                                                                                                        |                                           | N90238   | 1.6 |
| <b>ZNF258</b>   | zinc finger protein 258                                                                       |           | DNA binding, development                                                                               |                                           | N67657   | 1.6 |
|                 | ESTs                                                                                          | undefined |                                                                                                        |                                           | W23540   | 1.6 |
|                 | glutamate-ammonia ligase (glutamine synthase)                                                 |           |                                                                                                        |                                           |          |     |
| <b>GLUL</b>     |                                                                                               | undefined |                                                                                                        |                                           | H22918   | 1.5 |
|                 | ESTs                                                                                          | undefined |                                                                                                        |                                           | T83910   | 1.5 |

Homo sapiens cDNA FLJ12985 fis,  
clone NT2RP3000050, moderately  
similar to ZINC FINGER PROTEIN

|                                          |                                                                                   |                                                                                                                                                                      |                                |        |     |
|------------------------------------------|-----------------------------------------------------------------------------------|----------------------------------------------------------------------------------------------------------------------------------------------------------------------|--------------------------------|--------|-----|
|                                          | 91                                                                                | undefined                                                                                                                                                            | undefined                      | W35282 | 1.5 |
|                                          | undefined                                                                         | undefined                                                                                                                                                            | undefined                      | N74377 | 1.5 |
| <b>SPPL3</b>                             | SPPL3                                                                             | peptidase                                                                                                                                                            | integral to membrane           | R64681 | 1.5 |
| <b>Upregulated Genes in Crypt Middle</b> |                                                                                   |                                                                                                                                                                      |                                |        |     |
| <b>FLJ20508</b>                          | hypothetical protein FLJ20508                                                     | undefined                                                                                                                                                            | undefined                      | H78681 | 6.5 |
| <b>FLJ30681</b>                          | KIAA1983 protein                                                                  | calcium ion binding                                                                                                                                                  | undefined                      | H67346 | 3.3 |
|                                          | ESTs                                                                              | undefined                                                                                                                                                            | undefined                      | H79292 | 2.9 |
|                                          |                                                                                   | carboxy/metallopeptidase,<br>proteolysis/peptidolysis                                                                                                                | plasma membrane                | H93272 | 2.9 |
| <b>CPM</b>                               | carboxypeptidase M                                                                |                                                                                                                                                                      |                                | H74262 | 2.8 |
|                                          | ESTs                                                                              | undefined                                                                                                                                                            | undefined                      | H79396 | 2.8 |
|                                          | ESTs                                                                              | undefined                                                                                                                                                            | undefined                      |        |     |
|                                          |                                                                                   | transferase, delta DNA polymerase, DNA                                                                                                                               | nucleus                        | H53410 | 2.7 |
| <b>POLD4</b>                             | polymerase (DNA-directed), delta 4                                                | replication                                                                                                                                                          | undefined                      | H67306 | 2.7 |
|                                          | ESTs                                                                              | undefined                                                                                                                                                            | undefined                      | H77569 | 2.6 |
|                                          | ESTs                                                                              | undefined                                                                                                                                                            | undefined                      | H78565 | 2.5 |
|                                          | ESTs                                                                              | undefined                                                                                                                                                            | undefined                      | N28259 | 2.5 |
|                                          | ESTs                                                                              | undefined                                                                                                                                                            | undefined                      | H75964 | 2.5 |
|                                          | ESTs                                                                              | undefined                                                                                                                                                            | undefined                      | H73969 | 2.5 |
|                                          | ESTs                                                                              | undefined                                                                                                                                                            | undefined                      | H72693 | 2.4 |
|                                          | ESTs                                                                              | undefined                                                                                                                                                            | undefined                      | H73504 | 2.4 |
|                                          | ESTs                                                                              | undefined                                                                                                                                                            | undefined                      | H93200 | 2.4 |
|                                          | ESTs                                                                              | undefined                                                                                                                                                            | undefined                      | R96031 | 2.4 |
|                                          | complement component (3b/4b)<br>receptor 1, including Knops blood<br>group system | complement receptor, complement<br>activation                                                                                                                        | integral to plasma<br>membrane | H75766 | 2.4 |
| <b>CR1</b>                               |                                                                                   | undefined                                                                                                                                                            | undefined                      | H52561 | 2.4 |
|                                          | ESTs                                                                              | undefined                                                                                                                                                            | undefined                      | H72686 | 2.4 |
|                                          | ESTs                                                                              | undefined                                                                                                                                                            | undefined                      | H80299 | 2.3 |
|                                          | ESTs                                                                              | undefined                                                                                                                                                            | undefined                      | H72803 | 2.3 |
|                                          |                                                                                   | zinc ion binding, transcription factor, DNA-<br>dependent regulator of transcription                                                                                 | nucleus                        | H56184 | 2.3 |
| <b>MYT1</b>                              | myelin transcription factor 1                                                     |                                                                                                                                                                      |                                |        |     |
|                                          |                                                                                   | SH2/SH3 adaptor protein, intracellular<br>signaling cascade, cell/motility/actin<br>cytoskeleton organogenesis/biogenesis,<br>regulator of transcription from Pol II | nucleus/cytoplas<br>m          | H75530 | 2.3 |
| <b>CRK</b>                               | v-crk avian sarcoma virus CT10<br>oncogene homolog                                | promoter                                                                                                                                                             |                                | H73274 | 2.2 |
|                                          | ESTs                                                                              | undefined                                                                                                                                                            | undefined                      |        |     |
|                                          | putative protein kinase NY-REN-64<br>antigen                                      | undefined                                                                                                                                                            | undefined                      | H78687 | 2.2 |
| <b>LOC51135</b>                          |                                                                                   | transferase/UDP-N-acetylglucosamine<br>pyrophosphorylase, UDP-N-<br>acetylglucosamine biosynthesis                                                                   | undefined                      | H78933 | 2.2 |
| <b>UAP1</b>                              | UDP-N-acetylglucosamine<br>pyrophosphorylase 1                                    |                                                                                                                                                                      |                                |        |     |
|                                          | inter-alpha (globulin) inhibitor, H1<br>polypeptide                               | calcium ion binding, serine protease<br>inhibitor                                                                                                                    | undefined                      | H67336 | 2.2 |
| <b>ITIH1</b>                             |                                                                                   | undefined                                                                                                                                                            | undefined                      | H75387 | 2.2 |
|                                          | ESTs                                                                              | undefined                                                                                                                                                            | undefined                      | H79016 | 2.1 |
|                                          | ESTs                                                                              | undefined                                                                                                                                                            | undefined                      | H79160 | 2.1 |
|                                          | ESTs                                                                              | undefined                                                                                                                                                            | undefined                      |        |     |
|                                          | golgi autoantigen, golgin subfamily<br>a, 1                                       | undefined                                                                                                                                                            | undefined                      | H77390 | 2.1 |
| <b>GOLGA1</b>                            |                                                                                   |                                                                                                                                                                      |                                |        |     |

|                 |                                                                                                       |                                                                               |                                                |        |     |
|-----------------|-------------------------------------------------------------------------------------------------------|-------------------------------------------------------------------------------|------------------------------------------------|--------|-----|
|                 | ESTs                                                                                                  | undefined                                                                     | undefined                                      | H77738 | 2.1 |
| <b>CDC10</b>    | CDC10 (cell division cycle 10, S. cerevisiae, homolog)                                                | GTP binding, microtubule cytoskeleton, cell proliferation/cytokinesis         | microtubule cytoskeleton/actin/kinesin complex | H79411 | 2.1 |
|                 | ESTs                                                                                                  | undefined                                                                     | undefined                                      | H79508 | 2.1 |
| <b>E2IG3</b>    | putative nucleotide binding protein, estradiol-induced                                                | undefined                                                                     | undefined                                      | H53723 | 2.1 |
| <b>MLLT10</b>   | myeloid/lymphoid or mixed-lineage leukemia (trithorax (Drosophila) homolog); translocated to, 10      | DNA binding, transcription factor, DNA-dependent regulator of transcription   | nucleus                                        | H66479 | 2.1 |
| <b>SR140</b>    | US-associated R140 protein                                                                            | RNA binding, RNA processing                                                   |                                                | H93167 | 2.1 |
| <b>RPS6</b>     | ribosomal protein S6                                                                                  | undefined                                                                     | undefined                                      | H67329 | 2.0 |
| <b>DDX17</b>    | DEAD/H (Asp-Glu-Ala-Asp/His) box polypeptide 17 (72kD)                                                | RNA binding, RNA-dependent ATPase/RNA helicase, RNA processing                | nucleus                                        | H78808 | 2.0 |
|                 | ESTs                                                                                                  | undefined                                                                     | undefined                                      | H73375 | 2.0 |
|                 | ESTs                                                                                                  | undefined                                                                     | undefined                                      | H79123 | 2.0 |
| <b>PKNOX1</b>   | PBX/knotted 1 homeobox 1                                                                              | RNA pol II transcription factor                                               | undefined                                      | H77399 | 2.0 |
|                 | ESTs                                                                                                  | undefined                                                                     | undefined                                      | N54956 | 2.0 |
|                 | ESTs                                                                                                  | undefined                                                                     | undefined                                      | H65941 | 2.0 |
|                 | ESTs, Highly similar to Gene product with similarity to Multidrug resistance protein MRP1 [H.sapiens] | undefined                                                                     | undefined                                      | H75839 | 1.9 |
| <b>PSG4</b>     | pregnancy specific beta-1-glycoprotein 4                                                              | undefined                                                                     | undefined                                      | H67911 | 1.9 |
|                 | ESTs                                                                                                  | undefined                                                                     | undefined                                      | H79410 | 1.9 |
| <b>LOC51636</b> | CGI-93 protein                                                                                        | undefined                                                                     | undefined                                      | H56180 | 1.9 |
|                 | ESTs                                                                                                  | undefined                                                                     | undefined                                      | H77738 | 1.9 |
|                 | Homo sapiens mRNA; cDNA DKFZp434F1622 (from clone DKFZp434F1622)                                      | undefined                                                                     | undefined                                      | H79447 | 1.9 |
|                 | ESTs                                                                                                  | undefined                                                                     | undefined                                      | H80295 | 1.9 |
| <b>RTN4R</b>    | reticulin 4 receptor                                                                                  | receptor, axonogenesis                                                        | membrane plasma                                | H61387 | 1.8 |
| <b>RDX</b>      | radixin                                                                                               | actin binding, structural constituent of cytoskeleton, cytoskeletal anchoring | membrane/actin cytoskeleton                    | H80175 | 1.8 |
|                 | ESTs                                                                                                  | undefined                                                                     | undefined                                      | H80847 | 1.8 |
|                 | ESTs, Weakly similar to ALUB_HUMAN !!!! ALU CLASS B WARNING ENTRY !!!! [H.sapiens]                    | undefined                                                                     | undefined                                      | H78468 | 1.8 |
| <b>LOC51320</b> | hypothetical protein                                                                                  | undefined                                                                     | undefined                                      | R96053 | 1.8 |
| <b>SULT1A1</b>  | sulfotransferase family, cytosolic, 1A, phenol-preferring, member 1                                   | transferase/arylsulfotransferase, steroid/amine metabolism                    | undefined                                      | H67893 | 1.8 |
|                 | ESTs                                                                                                  | undefined                                                                     | undefined                                      | H52500 | 1.8 |
| <b>HLA-DRB1</b> | major histocompatibility complex, class II, DR beta 1                                                 | class II MHC antigen, response to stress/pathogens                            | integral to plasma membrane                    | H81481 | 1.8 |
|                 | Human clone 137308 mRNA, partial cds                                                                  | undefined                                                                     | undefined                                      | H91398 | 1.8 |

|                                       |                                                                                                                                               |                                                                                                                                                        |                                                 |          |     |
|---------------------------------------|-----------------------------------------------------------------------------------------------------------------------------------------------|--------------------------------------------------------------------------------------------------------------------------------------------------------|-------------------------------------------------|----------|-----|
|                                       |                                                                                                                                               | calcium ion binding, transcription factor,<br>DNA-dependent regulator of<br>transcription/transcription from the P <sub>0</sub> III<br>promoter, heart |                                                 |          |     |
| <b>HAND2</b>                          | heart and neural crest derivatives<br>expressed 2                                                                                             | development/angiogenesis                                                                                                                               | nucleus                                         | H78795   | 1.8 |
|                                       | ESTs                                                                                                                                          | undefined                                                                                                                                              | undefined                                       | H66628   | 1.7 |
|                                       |                                                                                                                                               |                                                                                                                                                        | microtubule<br>cytoskeleton/kin<br>esis complex | H92449   | 1.7 |
| <b>TRIAD3</b>                         | TRIAD3 protein                                                                                                                                | apoptosis                                                                                                                                              | undefined                                       | H78668   | 1.7 |
|                                       | ESTs                                                                                                                                          | undefined                                                                                                                                              | undefined                                       |          |     |
|                                       |                                                                                                                                               |                                                                                                                                                        | microtubuleasso<br>ciated                       |          |     |
|                                       |                                                                                                                                               | ATP binding, microtubule-based motor<br>activity                                                                                                       | complex/kinesin<br>complex                      | T65539   | 1.7 |
| <b>KIF2</b>                           | kinesin heavy chain member 2                                                                                                                  | undefined                                                                                                                                              | undefined                                       | H67452   | 1.6 |
|                                       | ESTs                                                                                                                                          | undefined                                                                                                                                              | undefined                                       | H73948   | 1.6 |
|                                       | ESTs                                                                                                                                          | undefined                                                                                                                                              | undefined                                       |          |     |
| <b>Upregulated Genes in Crypt Top</b> |                                                                                                                                               |                                                                                                                                                        |                                                 |          |     |
|                                       | ESTs                                                                                                                                          |                                                                                                                                                        |                                                 | H19445   | 6.5 |
|                                       | ESTs                                                                                                                                          |                                                                                                                                                        |                                                 | T92285   | 1.8 |
|                                       | disabled (Drosophila) homolog 2<br>(mitogen-responsive<br>phosphoprotein)                                                                     |                                                                                                                                                        |                                                 | H96724   | 1.7 |
| <b>DAB2</b>                           |                                                                                                                                               |                                                                                                                                                        |                                                 |          |     |
| <b>TRA1</b>                           | tumor rejection antigen (gp96) 1                                                                                                              |                                                                                                                                                        |                                                 | H65057   | 1.6 |
|                                       | ESTs                                                                                                                                          |                                                                                                                                                        |                                                 | W37504   | 1.6 |
|                                       |                                                                                                                                               |                                                                                                                                                        |                                                 | N99642   | 1.6 |
|                                       | ESTs                                                                                                                                          |                                                                                                                                                        |                                                 | N74386   | 1.5 |
|                                       |                                                                                                                                               |                                                                                                                                                        |                                                 | R02137   | 1.5 |
|                                       | syntrophin, alpha 1(dystrophin-<br>associated protein A1, 59kD, acidic<br>component)                                                          |                                                                                                                                                        |                                                 | H09104   | 1.5 |
| <b>SNTA1</b>                          |                                                                                                                                               |                                                                                                                                                        |                                                 |          |     |
|                                       | Homo sapiens cDNA FLJ12118 fis,<br>clone MAMMA1000085, weakly<br>similar to PUTATIVE CYSTEINYL-<br>TRNA SYNTHETASE C29E6.06C<br>(EC 6.1.1.16) |                                                                                                                                                        |                                                 | AA045241 | 1.5 |
|                                       | glucose-6-phosphate<br>dehydrogenase                                                                                                          |                                                                                                                                                        |                                                 | W92662   | 1.4 |
| <b>G6PD</b>                           | ESTs                                                                                                                                          |                                                                                                                                                        |                                                 | AA044150 | 1.4 |
|                                       |                                                                                                                                               |                                                                                                                                                        |                                                 | N95191   | 1.4 |
|                                       | ESTs                                                                                                                                          |                                                                                                                                                        |                                                 | N47405   | 1.4 |
|                                       | ESTs                                                                                                                                          |                                                                                                                                                        |                                                 | N71005   | 1.4 |
|                                       | ESTs                                                                                                                                          |                                                                                                                                                        |                                                 | R97175   | 1.4 |
|                                       | v-yes-1 Yamaguchi sarcoma viral<br>related oncogene homolog                                                                                   |                                                                                                                                                        |                                                 | R67762   | 1.4 |
| <b>LYN</b>                            | ESTs                                                                                                                                          |                                                                                                                                                        |                                                 | R68651   | 1.4 |
|                                       | Wiskott-Aldrich syndrome (eczema-<br>thrombocytopenia)                                                                                        |                                                                                                                                                        |                                                 | R06910   | 1.4 |
| <b>WAS</b>                            |                                                                                                                                               |                                                                                                                                                        |                                                 |          |     |
| <b>LOC51124</b>                       | HSPC039 protein                                                                                                                               |                                                                                                                                                        |                                                 | H17385   | 1.3 |
|                                       |                                                                                                                                               |                                                                                                                                                        |                                                 | R11506   | 1.3 |
|                                       | growth factor receptor-bound<br>protein 10                                                                                                    |                                                                                                                                                        |                                                 | N92349   | 1.3 |
| <b>GRB10</b>                          |                                                                                                                                               |                                                                                                                                                        |                                                 |          |     |
| <b>DKFZP547E2110</b>                  | DKFZP547E2110 protein                                                                                                                         |                                                                                                                                                        |                                                 | AA031787 | 1.3 |
|                                       | ESTs                                                                                                                                          |                                                                                                                                                        |                                                 | R12055   | 1.3 |
|                                       | related RAS viral (r-ras) oncogene<br>homolog                                                                                                 |                                                                                                                                                        |                                                 | W74233   | 1.3 |
| <b>RRAS</b>                           |                                                                                                                                               |                                                                                                                                                        |                                                 |          |     |

|                 |                                                                                                                                                                              |          |     |
|-----------------|------------------------------------------------------------------------------------------------------------------------------------------------------------------------------|----------|-----|
|                 | Homo sapiens mRNA; cDNA<br>DKFZp564B076 (from clone<br>DKFZp564B076)                                                                                                         | H62621   | 1.3 |
| <b>PAX8</b>     | paired box gene 8                                                                                                                                                            | AA115328 | 1.3 |
| <b>FLJ20285</b> | hypothetical protein FLJ20285                                                                                                                                                | N93342   | 1.3 |
| <b>ARF1</b>     | ADP-ribosylation factor 1                                                                                                                                                    | H20379   | 1.2 |
| <b>HMT-1</b>    | beta-1,4 mannosyltransferase                                                                                                                                                 | N99927   | 1.2 |
| <b>YG81</b>     | hypothetical protein LOC54149                                                                                                                                                | N22317   | 1.2 |
|                 | ESTs                                                                                                                                                                         | N74713   | 1.2 |
|                 | ESTs                                                                                                                                                                         | W57697   | 1.2 |
|                 | ESTs                                                                                                                                                                         | N51117   | 1.2 |
| <b>HAPIP</b>    | huntingtin-associated protein<br>interacting protein (duo)                                                                                                                   | R90768   | 1.2 |
| <b>CD3D</b>     | CD3D antigen, delta polypeptide<br>(TiT3 complex)                                                                                                                            | AA055945 | 1.2 |
|                 |                                                                                                                                                                              | N46377   | 1.2 |
| <b>HDAC2</b>    | histone deacetylase 2                                                                                                                                                        | AA125908 | 1.2 |
|                 |                                                                                                                                                                              | R68851   | 1.2 |
|                 | ESTs                                                                                                                                                                         | R70778   | 1.2 |
|                 | Homo sapiens cDNA- FLJ22182<br>fis, clone HRC00953                                                                                                                           | AA156747 | 1.2 |
|                 |                                                                                                                                                                              | H03340   | 1.2 |
| <b>SLC17A5</b>  | solute carrier family 17<br>(anion/sugar transporter), member<br>5                                                                                                           | W04643   | 1.2 |
| <b>RFXANK</b>   |                                                                                                                                                                              | N25631   | 1.2 |
|                 | ESTs                                                                                                                                                                         | T70765   | 1.2 |
| <b>UBE2A</b>    | ubiquitin-conjugating enzyme E2A<br>(RAD6 homolog)                                                                                                                           | AA133960 | 1.1 |
|                 | Homo sapiens HCMOGT-1 mRNA<br>for sperm antigen, complete cds                                                                                                                | R02582   | 1.1 |
|                 |                                                                                                                                                                              | R02382   | 1.1 |
|                 |                                                                                                                                                                              | H22692   | 1.1 |
| <b>RFC5</b>     | replication factor C (activator 1) 5<br>(36.5kD)                                                                                                                             | H10350   | 1.1 |
| <b>IQGAP1</b>   | IQ motif containing GTPase<br>activating protein 1                                                                                                                           | AA151625 | 1.1 |
| <b>DPYS</b>     | dihydropyrimidinase                                                                                                                                                          | N76073   | 1.1 |
| <b>PHKA2</b>    | phosphorylase kinase, alpha 2<br>(liver)                                                                                                                                     | N93367   | 1.1 |
| <b>ADCY7</b>    | adenylate cyclase 7                                                                                                                                                          | H58086   | 1.1 |
|                 | Human DNA sequence from clone<br>RP5-1046G13 on chromosome<br>6q12-13 Contains part of a gene<br>similar to Rattus norvegicus rab3<br>effector (RIM), ESTs, STSs and<br>GSSs | R19493   | 1.1 |
|                 | ESTs                                                                                                                                                                         | AA002250 | 1.1 |
| <b>ZNF22</b>    | zinc finger protein 22 (KOX 15)                                                                                                                                              | AA115745 | 1.1 |
| <b>PRAME</b>    | preferentially expressed antigen in<br>melanoma                                                                                                                              | AA136089 | 1.1 |
|                 | ESTs                                                                                                                                                                         | N24906   | 1.1 |
| <b>APG12L</b>   | Apg12 (autophagy 12, S.<br>cerevisiae)-like                                                                                                                                  | H17690   | 1.1 |
|                 |                                                                                                                                                                              | AA203550 | 1.1 |

|                   |                                                                                                                                                                                                                                                                                                 |                  |            |
|-------------------|-------------------------------------------------------------------------------------------------------------------------------------------------------------------------------------------------------------------------------------------------------------------------------------------------|------------------|------------|
| <b>FLJ10210</b>   | hypothetical protein FLJ10210                                                                                                                                                                                                                                                                   | T78406           | 1.1        |
| <b>AOAH</b>       | acyloxyacyl hydrolase (neutrophil)<br>ESTs                                                                                                                                                                                                                                                      | T94800<br>W03263 | 1.1<br>1.1 |
|                   | ESTs                                                                                                                                                                                                                                                                                            | R38456           | 1.1        |
| <b>ANXA3</b>      | annexin A3<br>ESTs                                                                                                                                                                                                                                                                              | R52939           | 1.1        |
|                   | ESTs                                                                                                                                                                                                                                                                                            | AA167659         | 1.1        |
|                   | ESTs                                                                                                                                                                                                                                                                                            | H43974           | 1.1        |
| <b>DKFZP586K1</b> | DKFZP586K0919 protein<br>ESTs                                                                                                                                                                                                                                                                   | R05816           | 1.1        |
|                   | ESTs                                                                                                                                                                                                                                                                                            | R10564           | 1.1        |
|                   | ESTs                                                                                                                                                                                                                                                                                            | N63402           | 1.0        |
|                   | ESTs                                                                                                                                                                                                                                                                                            | R82747           | 1.0        |
|                   | ESTs                                                                                                                                                                                                                                                                                            | R11870           | 1.0        |
| <b>AGXT2</b>      | alanine-glyoxylate<br>aminotransferase 2                                                                                                                                                                                                                                                        | R10286           | 1.0        |
| <b>GBF1</b>       | golgi-specific brefeldin A resistance<br>factor 1                                                                                                                                                                                                                                               | AA099341         | 1.0        |
|                   |                                                                                                                                                                                                                                                                                                 | T85310           | 1.0        |
| <b>FLJ10583</b>   | hypothetical protein FLJ10583<br>ESTs                                                                                                                                                                                                                                                           | T99853           | 1.0        |
|                   | ESTs                                                                                                                                                                                                                                                                                            | H49519           | 1.0        |
|                   |                                                                                                                                                                                                                                                                                                 | H03167           | 1.0        |
|                   |                                                                                                                                                                                                                                                                                                 | N48735           | 1.0        |
| <b>UBE2B</b>      | ubiquitin-conjugating enzyme E2B<br>(RAD6 homolog)<br>ESTs, Weakly similar to putative<br>p150 [H.sapiens]                                                                                                                                                                                      | R14961           | 1.0        |
|                   |                                                                                                                                                                                                                                                                                                 | H84526           | 1.0        |
|                   |                                                                                                                                                                                                                                                                                                 | R05301           | 1.0        |
| <b>PDGFRB</b>     | platelet-derived growth factor<br>receptor, beta polypeptide<br>ESTs                                                                                                                                                                                                                            | AA046654         | 1.0        |
|                   |                                                                                                                                                                                                                                                                                                 | AA213820         | 1.0        |
|                   | Human DNA sequence from clone<br>696P19 on chromosome 6p12.3-<br>21.2. Contains the gene for TFEB,<br>an NPM1 (Nucleophosmin,<br>Numatrin) pseudogene and the<br>MDFI gene for MyoD family<br>inhibitor (myogenic repressor I-MF).<br>Contains ESTs, STSs, GSSs and<br>two putative CpG islands |                  |            |
| <b>TFEB</b>       |                                                                                                                                                                                                                                                                                                 | R22427           | 1.0        |
| <b>KIAA0669</b>   | KIAA0669 gene product<br>ESTs                                                                                                                                                                                                                                                                   | R62374           | 1.0        |
|                   |                                                                                                                                                                                                                                                                                                 | R79612           | 1.0        |
| <b>PSMB9</b>      | proteasome (prosome, macropain)<br>subunit, beta type, 9 (large<br>multifunctional protease 2)                                                                                                                                                                                                  | R80719           | 0.9        |
| <b>NRD1</b>       | nardilysin (N-arginine dibasic<br>convertase)                                                                                                                                                                                                                                                   | R42028           | 0.9        |
|                   |                                                                                                                                                                                                                                                                                                 | R09548           | 0.9        |
|                   |                                                                                                                                                                                                                                                                                                 | AA039324         | 0.9        |
| <b>RTN3</b>       | reticulon 3                                                                                                                                                                                                                                                                                     | R52816           | 0.9        |
| <b>KIAA0411</b>   | KIAA0411 gene product                                                                                                                                                                                                                                                                           | R85335           | 0.9        |
| <b>TFPI2</b>      | tissue factor pathway inhibitor 2                                                                                                                                                                                                                                                               | H12333           | 0.9        |
|                   |                                                                                                                                                                                                                                                                                                 | T75369           | 0.9        |



|                     |                                                                                                                  |          |     |
|---------------------|------------------------------------------------------------------------------------------------------------------|----------|-----|
| <b>LOC115286</b>    | hypothetical protein LOC 115286                                                                                  | H15744   | 0.9 |
| <b>ARRB2</b>        | arrestin, beta 2                                                                                                 | T97814   | 0.9 |
| <b>CYP19</b>        | cytochrome P450, subfamily XIX<br>(aromatization of androgens)                                                   | H00690   | 0.9 |
| <b>TGIF</b>         | TG-interacting factor (TALE family<br>homeobox)                                                                  | R70894   | 0.9 |
| <b>HNRPH1</b>       | heterogeneous nuclear<br>ribonucleoprotein H1 (H)                                                                | H88577   | 0.9 |
|                     | ESTs                                                                                                             | T99720   | 0.9 |
| <b>FLJ10895</b>     | hypothetical protein FLJ10895                                                                                    | N44094   | 0.9 |
| <b>FLJ10525</b>     | hypothetical protein FLJ10525                                                                                    | H15171   | 0.9 |
|                     | ESTs                                                                                                             | R06918   | 0.9 |
| <b>CYB5</b>         | cytochrome b-5                                                                                                   | R98556   | 0.9 |
|                     | ESTs, Weakly similar to KIAA0872<br>protein [H.sapiens]                                                          | R13050   | 0.9 |
| <b>PIK3C3</b>       | phosphoinositide-3-kinase, class 3                                                                               | AA149493 | 0.9 |
| <b>CRA</b>          | cisplatin resistance associated                                                                                  | R50652   | 0.9 |
|                     |                                                                                                                  | N34012   | 0.9 |
|                     | ESTs, Highly similar to A56110<br>tyrosine phosphoprotein SLP-76 -<br>human [H.sapiens]                          | R16888   | 0.9 |
|                     | ESTs, Weakly similar to<br>PZP_HUMAN PREGNANCY ZONE<br>PROTEIN PRECURSOR [H.sapiens]                             | AA142969 | 0.8 |
|                     |                                                                                                                  | AA194925 | 0.8 |
|                     | ESTs                                                                                                             | R61775   | 0.8 |
| <b>KIAA0676</b>     | KIAA0676 protein                                                                                                 | R25017   | 0.8 |
| <b>RNAHP</b>        | RNA helicase-related protein                                                                                     | T48016   | 0.8 |
| <b>BAIAP2</b>       | BAI1-associated protein 2                                                                                        | H22058   | 0.8 |
|                     |                                                                                                                  | AA147568 | 0.8 |
| <b>FOXO1A</b>       | forkhead box O1A<br>(rhabdomyosarcoma)                                                                           | AA019811 | 0.7 |
| <b>LOC51101</b>     | CGI-62 protein                                                                                                   | W87505   | 0.7 |
|                     | Homo sapiens, alpha-1 (VI)<br>collagen                                                                           | R49887   | 0.7 |
|                     | ESTs                                                                                                             | W94547   | 0.7 |
|                     | ESTs, Weakly similar to KIAA1204<br>protein [H.sapiens]                                                          | T92245   | 0.7 |
|                     | ESTs                                                                                                             | T70264   | 0.7 |
| <b>ZNF262</b>       | zinc finger protein 262                                                                                          | AA149227 | 0.7 |
|                     | ESTs, Moderately similar to<br>ALU1_HUMAN ALU SUBFAMILY J<br>SEQUENCE CONTAMINATION<br>WARNING ENTRY [H.sapiens] | R48562   | 0.7 |
| <b>ZHX1</b>         | zinc-fingers and homeoboxes 1                                                                                    | T66784   | 0.7 |
| <b>DKFZP434N061</b> | DKFZP434N061 protein                                                                                             | R02568   | 0.7 |
|                     | Homo sapiens cDNA FLJ14188 fis,<br>clone NT2RP2005980                                                            | W61235   | 0.6 |
|                     |                                                                                                                  | H30081   | 0.5 |
|                     | ESTs                                                                                                             | H72169   | 0.3 |
